# Supplementary material for: Do Pornography Use and Masturbation Frequency Play a Role in Delayed/Inhibited Ejaculation during Partnered Sex? A Comprehensive and Detailed Analysis
Source: MDPI journal article supplement (doi:10.3390/sexes3010010), 2022-02-06
Supplement: s1 [file s1]

**Table S1.** Survey questions for the regression covariates.

| Variable Name                     | Survey Question                                                                                                                                                                                                                                                                                       | Values/Levels                                                                                                                                                                                                                                                                                                 |
|-----------------------------------|-------------------------------------------------------------------------------------------------------------------------------------------------------------------------------------------------------------------------------------------------------------------------------------------------------|---------------------------------------------------------------------------------------------------------------------------------------------------------------------------------------------------------------------------------------------------------------------------------------------------------------|
| Level of Education                | What is your highest level of education completed?                                                                                                                                                                                                                                                    | 0 = Less than high school<br>1 = High school<br>2 = Skill/technical certification<br>3 = Some college<br>4 = Undergraduate degree<br>5 = Graduate/post-bac study                                                                                                                                              |
| Anxiety/Depression                | Are you currently suffering from ongoing/persistent (>6 months) anxiety or depression?                                                                                                                                                                                                                | 0 = No<br>1 = Yes                                                                                                                                                                                                                                                                                             |
| Medical Issues                    | Do you have any of the following ongoing medical issues: high blood pressure, diabetes, cardiovascular disease, or lower urinary tract problems or other problems likely to interfere with sexual response?<br><br>If yes, are you taking medication for treatment of the following medical issue(s)? | 0 = No<br>1 = Yes<br><br>0 = Not Applicable<br>1 = No<br>2 = Yes<br>3 = Specify                                                                                                                                                                                                                               |
| Importance/Interest in Sex        | Please rate the <i>general</i> importance of sex for, that is, not distinguishing whether with a partner or through masturbation.<br><br>Please rate your overall level of interest in and/or desire for sex, that is, not distinguishing whether with a partner or through masturbation.             | 1 = Not at all important<br>5 = Very important<br><br>1 = Not interested<br>5 = Very interested                                                                                                                                                                                                               |
| Frequency of Partnered Sex        | Considering your history with your current or most recent (primary) sexual partner, about how often do you or did you have sex with your partner? (Choose only one)                                                                                                                                   | 0 = NA<br>1 = Never<br>2 = Almost never<br>3 = Less than once a month<br>4 = About once a month<br>5 = About 1 time every 2 weeks<br>6 = About 1 time per week<br>7 = 2-3 times per week<br>8 = 4-6 times per week<br>9 = About once a day<br>10 = More than once a day                                       |
| Sexual Relationship Satisfaction  | How satisfied are you with the <i>SEXUAL</i> aspects of your current primary sexual relationship?                                                                                                                                                                                                     | 0 = NA: I am not in a sexual relationship at this time<br>1 = Not at all satisfied/low quality<br>5 = Very satisfied/high quality                                                                                                                                                                             |
| General Relationship Satisfaction | Beyond sexual issues, how satisfied are you with the <i>OVERALL</i> aspects of your current primary relationship?                                                                                                                                                                                     | 0 = NA: I am not in a relationship at this time or I have no broader relationship with this individual – it is only about sex<br>1 = Not at all satisfied/low quality<br>5 = Very satisfied/high quality                                                                                                      |
| Frequency of Masturbation         | About how often do you masturbate?                                                                                                                                                                                                                                                                    | 0 = Never<br>1 = Almost never<br>2 = Less than once a month<br>3 = About once a month<br>4 = About 1 time every 2 weeks<br>5 = About 1 time per week<br>6 = About 2-3 times per week<br>7 = About 4-6 times per week<br>8 = About once a day<br>9 = About 2-3 times per day<br>10 = More than 4 times per day |
| Pornography Use (Masturbation)    | Using the past 12-24 months as your timeframe, have you used erotic materials (e.g., print, video, internet, audio) when you masturbate?<br><br>About what percent of the time do you use erotic materials when you masturbate?                                                                       | 0 = NA: I do not masturbate<br>1 = No<br>2 = Yes<br><br>0 = Never or NA<br>1 = Rarely or less than 15%<br>2 = About 15-40%                                                                                                                                                                                    |

|                   |                                                                                                                                  |                                                                                                                                                                                                                                                                                                      |
|-------------------|----------------------------------------------------------------------------------------------------------------------------------|------------------------------------------------------------------------------------------------------------------------------------------------------------------------------------------------------------------------------------------------------------------------------------------------------|
|                   |                                                                                                                                  | 3 = About 40-60%                                                                                                                                                                                                                                                                                     |
|                   |                                                                                                                                  | 4 = About 60-85%                                                                                                                                                                                                                                                                                     |
|                   |                                                                                                                                  | 5 = Very often or more than 85%                                                                                                                                                                                                                                                                      |
| Erectile Function | During partnered sex, how do you rate your confidence that you could get and keep an erection?                                   | 0 = NA: I have never had sexual activity with a partner<br>1 = Very low<br>2 = Low<br>3 = Moderate<br>4 = High<br>5. Very high                                                                                                                                                                       |
|                   | During partnered sex, how often are your erections hard?                                                                         | 0 = NA: I have never had sexual activity with a partner<br>1 = Almost never or never<br>2 = A few times (less than half the time, about 25%)<br>3 = Sometimes (about half the time)<br>4 = Most times (more than half the time, about 75%)<br>5 = Almost always or always                            |
|                   | During partnered sex, how often are you able to maintain your erection after you have begun having sex with your partner?        | 0 = NA: I have never had sexual activity with a partner<br>1 = Almost never or never<br>2 = A few times (less than half the time, about 25%)<br>3 = Sometimes (about half the time)<br>4 = Most times (more than half the time, about 75%)<br>5 = Almost always or always                            |
|                   | During partnered sex, how difficult is it to maintain your erection to completion, that is, to ejaculate (assuming you want to)? | 0 = NA: I have never had sexual activity with a partner<br>1 = NA: I have had sexual activity with a partner, but I choose not to ejaculate / reach orgasm due to personal beliefs.<br>2 = Extremely difficult<br>3 = Very difficult<br>4 = Difficult<br>5 = Slightly difficult<br>6 = Not difficult |

**Table S2.** Survey questions for the outcome variables related to Delayed/Inhibited Ejaculation.

| Variable Name                   | Survey Question                                                                                                                                                                                                                                                                                                                                                                                                                                                    | Values/Levels                                                                                                           |
|---------------------------------|--------------------------------------------------------------------------------------------------------------------------------------------------------------------------------------------------------------------------------------------------------------------------------------------------------------------------------------------------------------------------------------------------------------------------------------------------------------------|-------------------------------------------------------------------------------------------------------------------------|
| Difficulty Reaching Ejaculation | During partnered sex, do you ever have difficulty reaching orgasm? (1 = almost never, 5 = almost always)                                                                                                                                                                                                                                                                                                                                                           | 1 = NA: I have never had sexual activity with a partner                                                                 |
|                                 |                                                                                                                                                                                                                                                                                                                                                                                                                                                                    | 2 = NA: I have had sexual activity with a partner but I choose not to ejaculate / reach orgasm due to personal beliefs. |
|                                 |                                                                                                                                                                                                                                                                                                                                                                                                                                                                    | 3 = 1                                                                                                                   |
|                                 |                                                                                                                                                                                                                                                                                                                                                                                                                                                                    | 4 = 2                                                                                                                   |
|                                 |                                                                                                                                                                                                                                                                                                                                                                                                                                                                    | 5 = 3                                                                                                                   |
|                                 |                                                                                                                                                                                                                                                                                                                                                                                                                                                                    | 6 = 4                                                                                                                   |
| % of Time Reaching Ejaculation  | Estimate how often sex with a partner typically ends in (or ended in) orgasm for you by placing an X on the line below.<br>Base your answer on your current or most recent primary sexual partner. If you have never had a sexual partner, have not had any sexual activities with your partner, or if you choose not to reach orgasm, select NA (not applicable).<br>{*ON THE ONLINE SURVEY, WE USE MULTIPLE CHOICE WITH NA=0, 0% (Never)=1, 10%=2, 20%=3...etc.} | 7 = 5                                                                                                                   |
|                                 |                                                                                                                                                                                                                                                                                                                                                                                                                                                                    | 0 = NA                                                                                                                  |
|                                 |                                                                                                                                                                                                                                                                                                                                                                                                                                                                    | 1 = 0%                                                                                                                  |
|                                 |                                                                                                                                                                                                                                                                                                                                                                                                                                                                    | 11 = 100%                                                                                                               |
