# Supplementary material for: Do Pornography Use and Masturbation Frequency Play a Role in Delayed/Inhibited Ejaculation during Partnered Sex? A Comprehensive and Detailed Analysis
Source: MDPI journal article supplement (doi:10.3390/sexes3010010), 2022-02-06
Supplement: s1 [file s1]

Archive with 1 entries (1 files):
- sexes-1555129-supplementary.pdf
